# Supplementary material
Source: PubMed Central journal article supplement (PMC4684982)
Supplement: NIHMS736509-supplement-1.pdf [file NIHMS736509-supplement-1.pdf]

### Supplemental Fig. 1: ChgA-deficient mice lack the antigen for BDC-2.5 CD4 T cells.

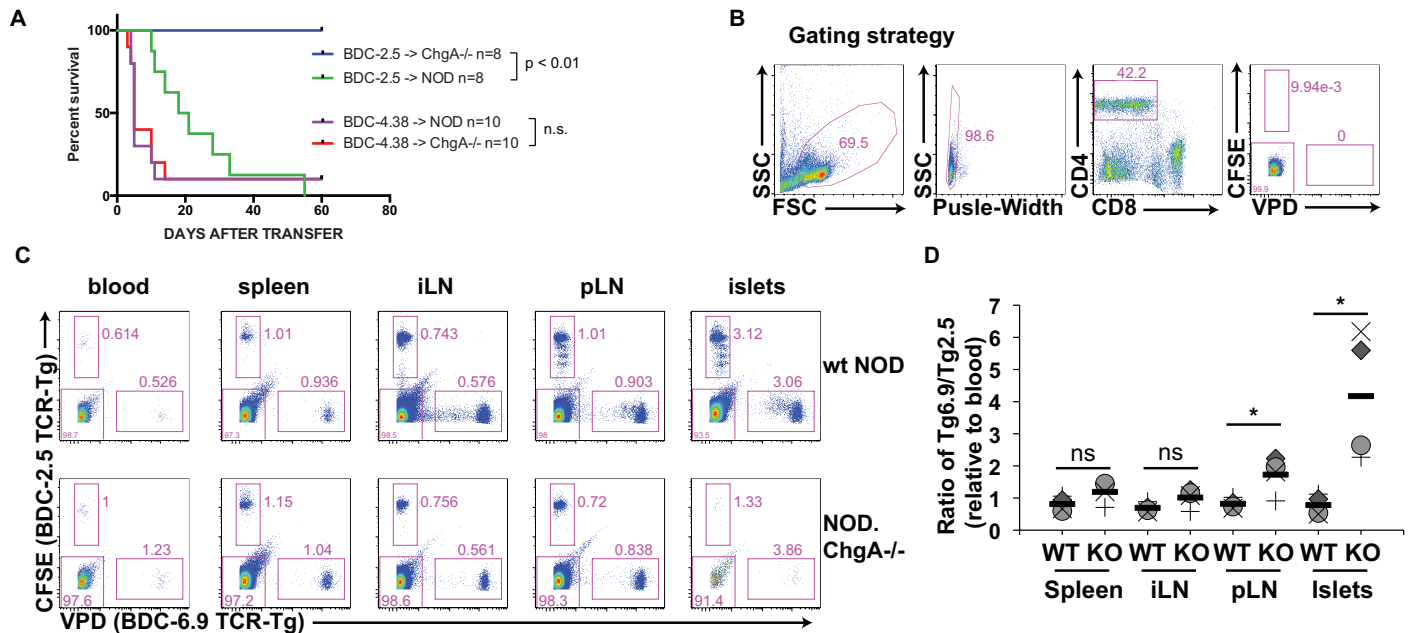

(A) To test for the presence of antigen *in vivo* in ChgA-deficient mice, very young (< 14 days old) wt NOD (n = 8), or NOD.ChgA<sup>-/-</sup> (n = 8) mice were injected i.p. with  $1 \times 10^7$  BDC-2.5 T cells and as another control, young wt NOD (n = 10) or NOD.ChgA<sup>-/-</sup> (n = 10) mice were injected i.p. with  $1 \times 10^7$  insulin-reactive BDC-4.38 T cells. Mice were then monitored for development of hyperglycemia. Data summarize three experiments for BDC-2.5 and three experiments for BDC-4.38. (B, C & D) To test for activation of ChgA-reactive T cells in ChgA-deficient mice, CD4 T cells were isolated from BDC-2.5 TCR-Tg and BDC-6.9 TCR-Tg NOD mice and labeled with either CFSE (BDC-2.5 TCR-Tg) or VPD (BDC-6.9 TCR-Tg). Since the CFSE dye is more sensitive at detecting proliferation, dyes were switched in repeat experiments. BDC-2.5 TCR-Tg ( $5 \times 10^6$  cells) and BDC-6.9 TCR-Tg ( $5 \times 10^6$  cells) cells were then co-injected i.v. into NOD (WT) or NOD.ChgA<sup>-/-</sup> (KO) mice. Two days after transfer, cell suspensions from spleen, inguinal lymph nodes (iLN), pancreatic lymph nodes (pLN), blood and hand-picked islets were analyzed by flow cytometry. (B) Gating strategy is shown for an uninjected mouse: gates were set on the lymphocyte gate, singlets, CD8- and CD4+ cells. (C) Representative flow cytometric graphs from the blood, spleen, inguinal lymph node (iLN), pancreatic lymph node (pLN) and islets (wt NOD vs NOD.ChgA<sup>-/-</sup>) are shown for wt NOD (top) and NOD.ChgA<sup>-/-</sup> (bottom) recipient mice. (D) Data are expressed as a ratio of the percentage of BDC-6.9 TCR-Tg over BDC-2.5 TCR-Tg CD4 T cells relative to the ratio present in the blood. Data are representative of two independent experiments with 2 mice per group in each experiment. Each symbol represents an individual mouse and averages are indicated as a black horizontal bar.

**Supplementary Fig. 2:** 2.5mi tetramer-positive CD4 T cells do not accumulate in the pancreas of NOD.ChgA<sup>-/-</sup> mice.

### A: Gating strategy

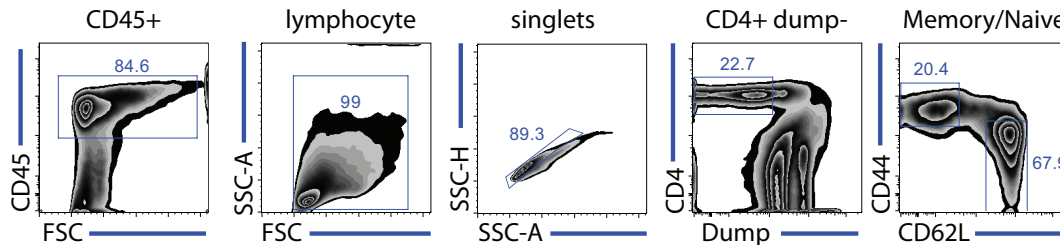

### B: Spleen

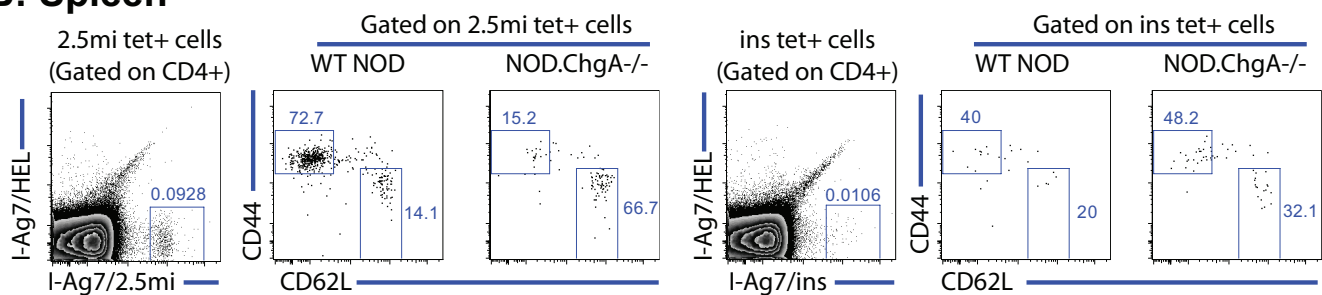

### C: Pancreas

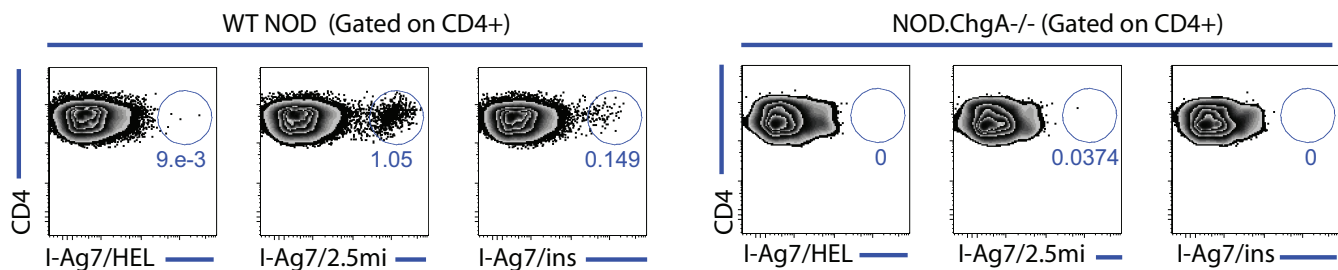

Single cell suspensions from spleen and pancreas were stained with tetramers specific for T cells reactive to HEL, ChgA (2.5mi), or insulin (Insp8G). After 1h incubation, cells were surface stained with anti-CD4, anti-CD44, anti-CD62L, anti-CD45, 7AAD and anti-CD8, anti-CD11b, anti-CD11c, anti-CD19, anti-F4/80 and analyzed by flow cytometry. (A) Gating strategy is shown: gates were set on CD45<sup>+</sup> cells, the lymphocyte gate, singlets, CD4<sup>+</sup> and dump- (CD8, CD11b, CD11c, CD19, F4/80 and 7AAD). Memory CD4 T cells were defined as CD44<sup>hi</sup> CD62L<sup>lo</sup> and Naïve CD4 T cells were CD44<sup>lo</sup> CD62L<sup>hi</sup> (B and C) Representative flow plots are shown from WT NOD vs NOD.ChgA<sup>-/-</sup> mice: (B) spleen, (C) pancreas. Data is representative of three (B) and four (C) independent experiments with 2 mice per group per experiment.
